# Supplementary material for: Impact of Soy β-Conglycinin Peptides on PCSK9 Protein Expression in HepG2 Cells
Source: MDPI journal article supplement (doi:10.3390/nu14010193), 2021-12-31
Supplement: s1 [file s1]

**Supplemental Figure S1.**  $\beta$ -Galactosidase activity. It was assayed to assess treatment interference with transfection and/or protein expression. pCMV- $\beta$  vector, encoding for  $\beta$ -galactosidase, was transfected in HepG2 cells.

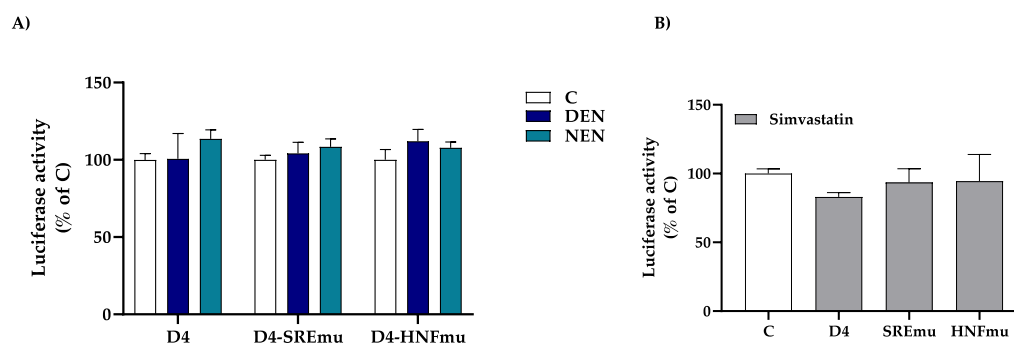

Panel A) shows luciferase activity upon treatment with YVNPNDN**DEN** (350  $\mu$ M) and YVNPNDNN**NEN** (350  $\mu$ M) peptides. Panel B) shows luciferase activity upon treatment with simvastatin (20  $\mu$ M). pCMV- $\beta$  vector encoding for  $\beta$ -galactosidase was transfected in HepG2 cells. Cells were transiently transfected with pGL3-PCSK9-D4 plasmids (wild-type, SRE-mu and HNF-1-mu). SRE-mu, mutation in sterol regulatory element motif; HNF-mu, mutation in hepatocyte nuclear factor alpha motif; DEN, YVNPNDN**DEN**; NEN, YVNPNDNN**NEN**

**Supplemental Figure S2.** PCSK9-LDLR binding activity. YVNPNDN**DEN** and YVNPNDNN**NEN** peptides did not inhibit the PCSK9-LDLR binding.

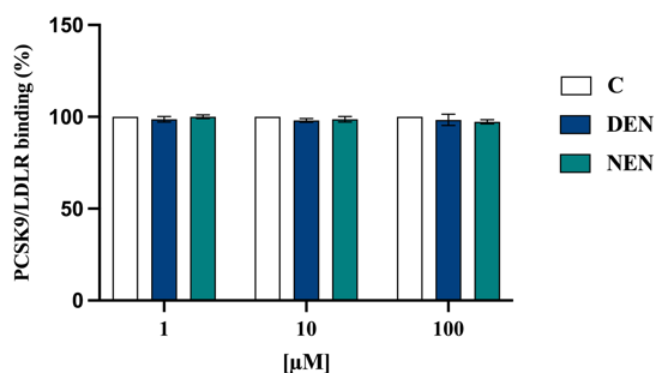

The YVNPNDN**DEN** and YVNPNDNN**NEN** peptides were added to proper amount of His-tagged PCSK9 in each coated well with LDLR-AB domain. The percentage of PCSK9-LDLR binding inhibition was measured from the absorbance reduction at 450 nm. DEN, YVNPNDN**DEN**; NEN, YVNPNDNN**NEN**;
